# Supplementary material for: Influence of the Growing Region on the Phytochemical Composition and Antioxidant Properties of North American Cranberry Fruit (Vaccinium macrocarpon Aiton)
Source: MDPI journal article supplement (doi:10.3390/plants12203595), 2023-10-17
Supplement: s1 [file s1]

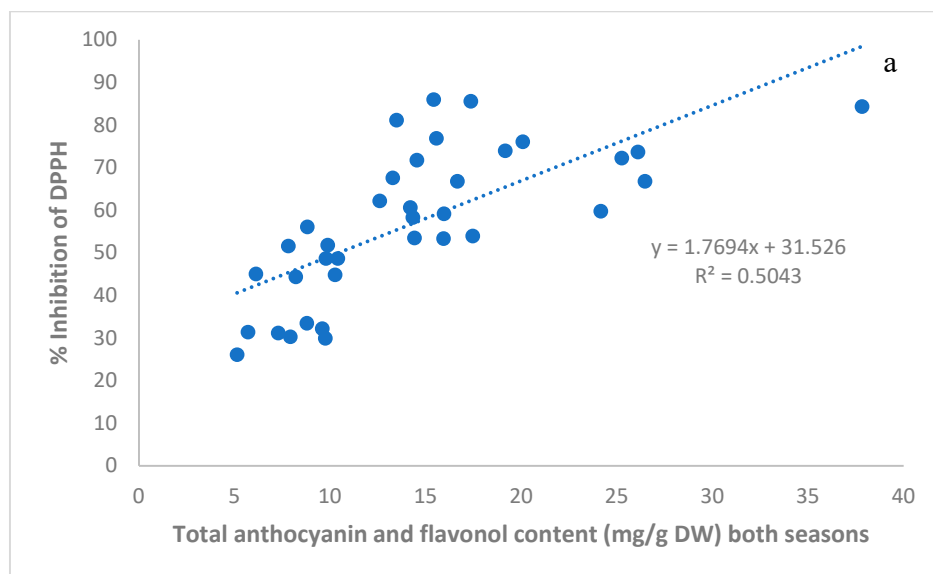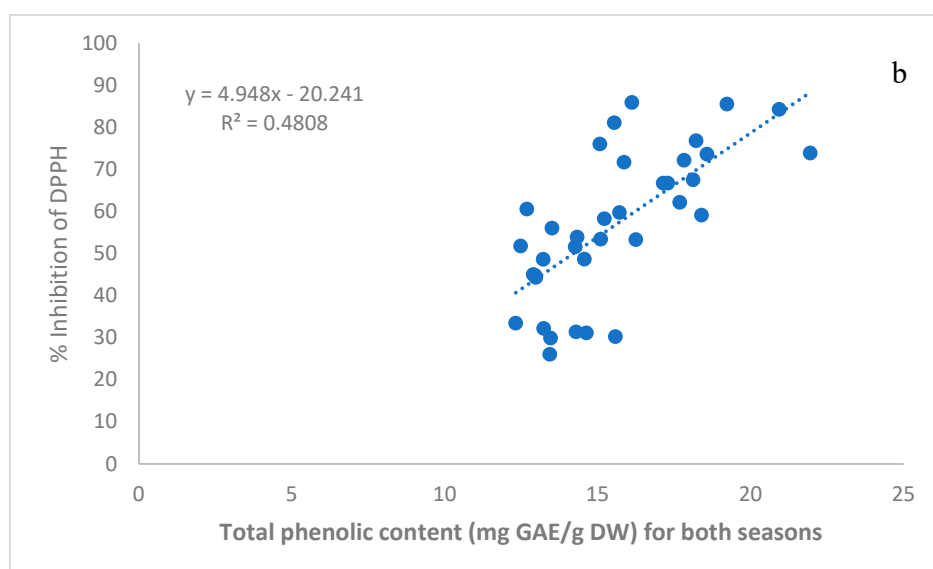

**Figure S1:** Linear correlation analysis data for all sample treatments, comparing antioxidant activity (% inhibition of DPPH radical) and (a) Total content of anthocyanins and flavonols, statistically significant positive correlation ( $p = 0.0000021$ ); (b) Total phenolics content, statistically significant positive correlation ( $p = 0.0000049$ ).

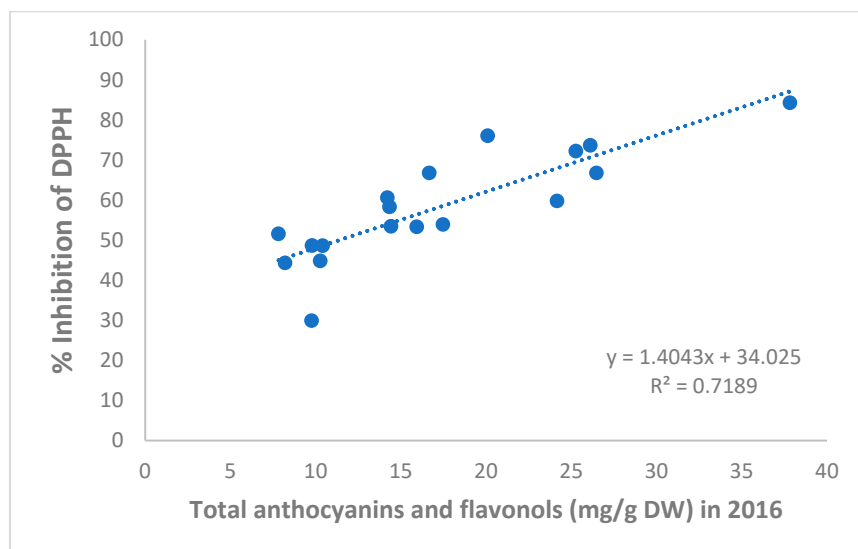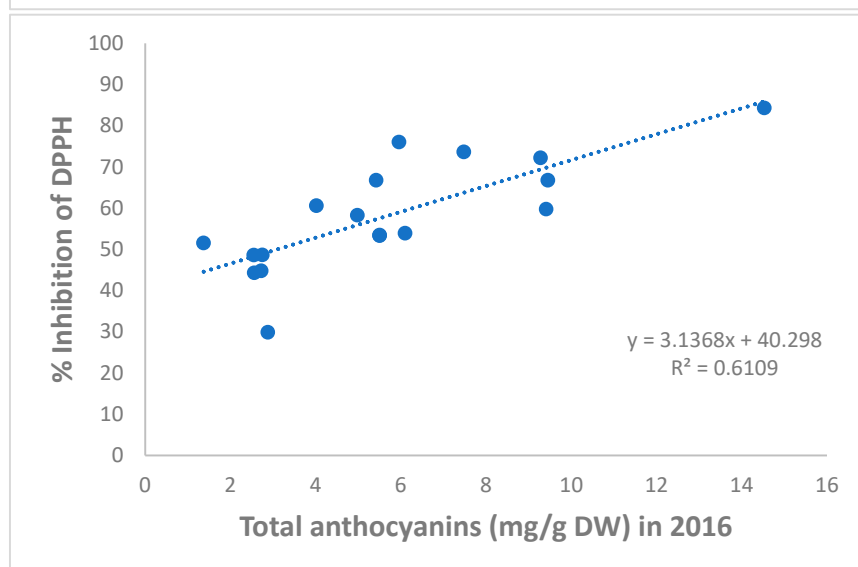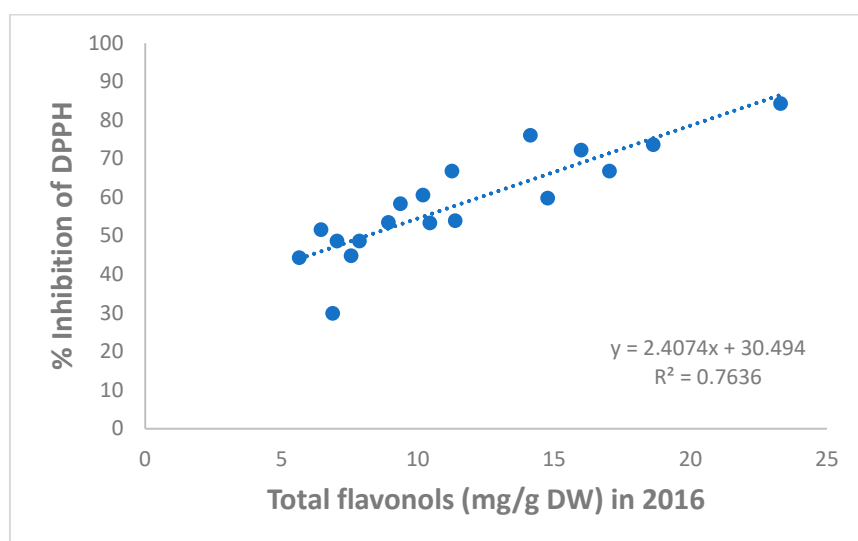

**Figure S2:** Linear correlation data for antioxidant activity with flavonoid content, 2016 fruit. Top: total content of anthocyanins and flavonols, significant positive correlation ( $p = 0.000025$ ). Middle: total anthocyanins, significant positive correlation ( $p = 0.00031$ ). Bottom: total flavonols, significant positive correlation ( $p = 0.0000062$ ).

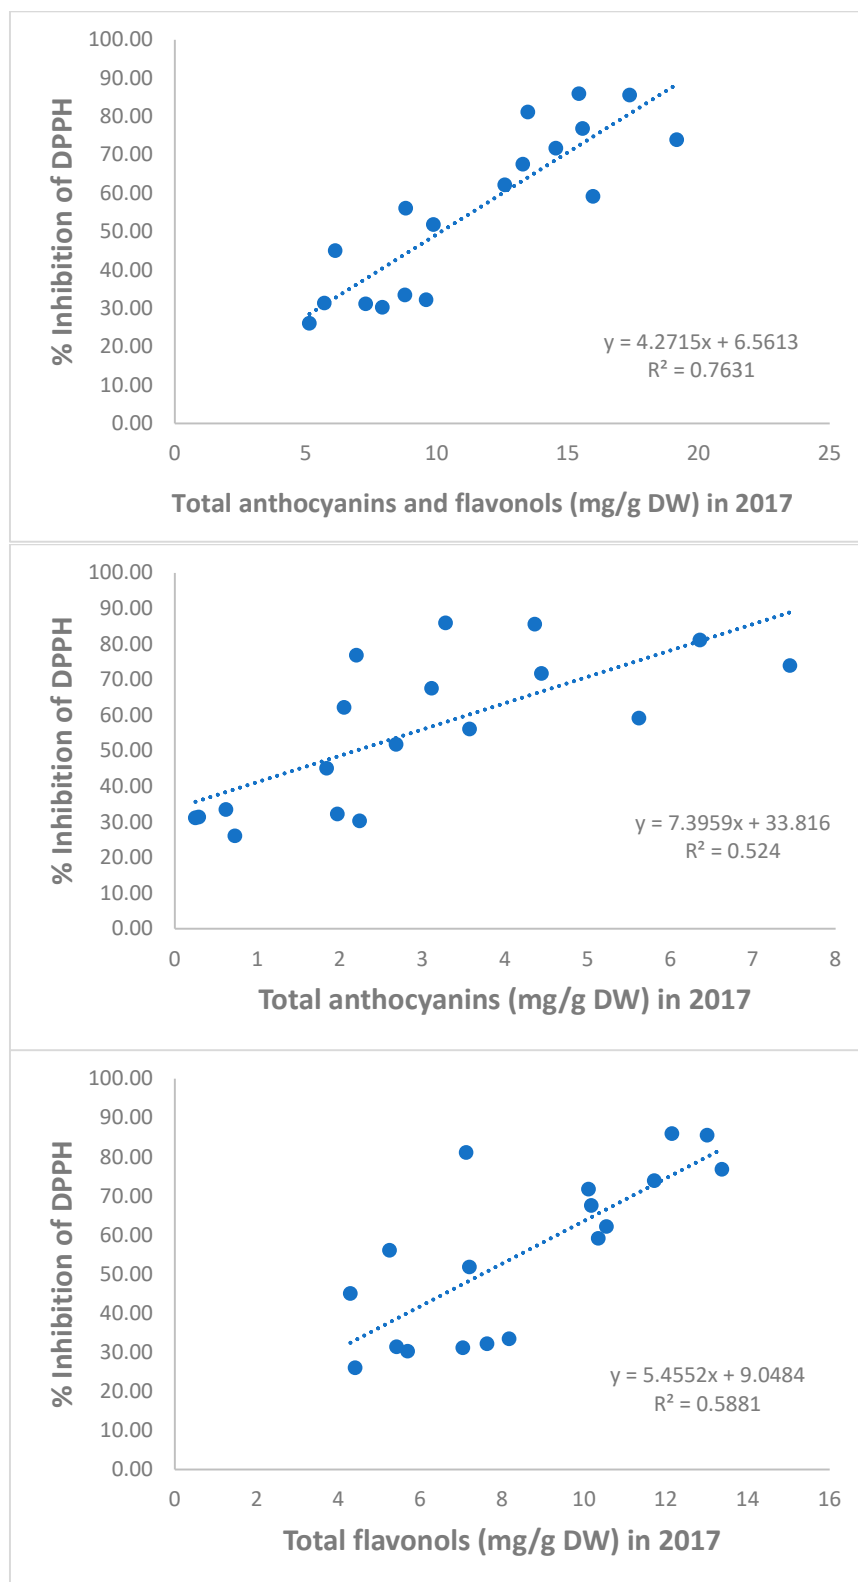

**Figure S3:** Linear correlation data for antioxidant activity with flavonoid content, 2017 fruit. Top: total content of anthocyanins and flavonols, significant positive correlation ( $p = 0.0000027$ ).

Middle: total anthocyanins, significant positive correlation ( $p = 0.001$ ). Bottom: total flavonols, significant positive correlation ( $p = 0.00023$ ).

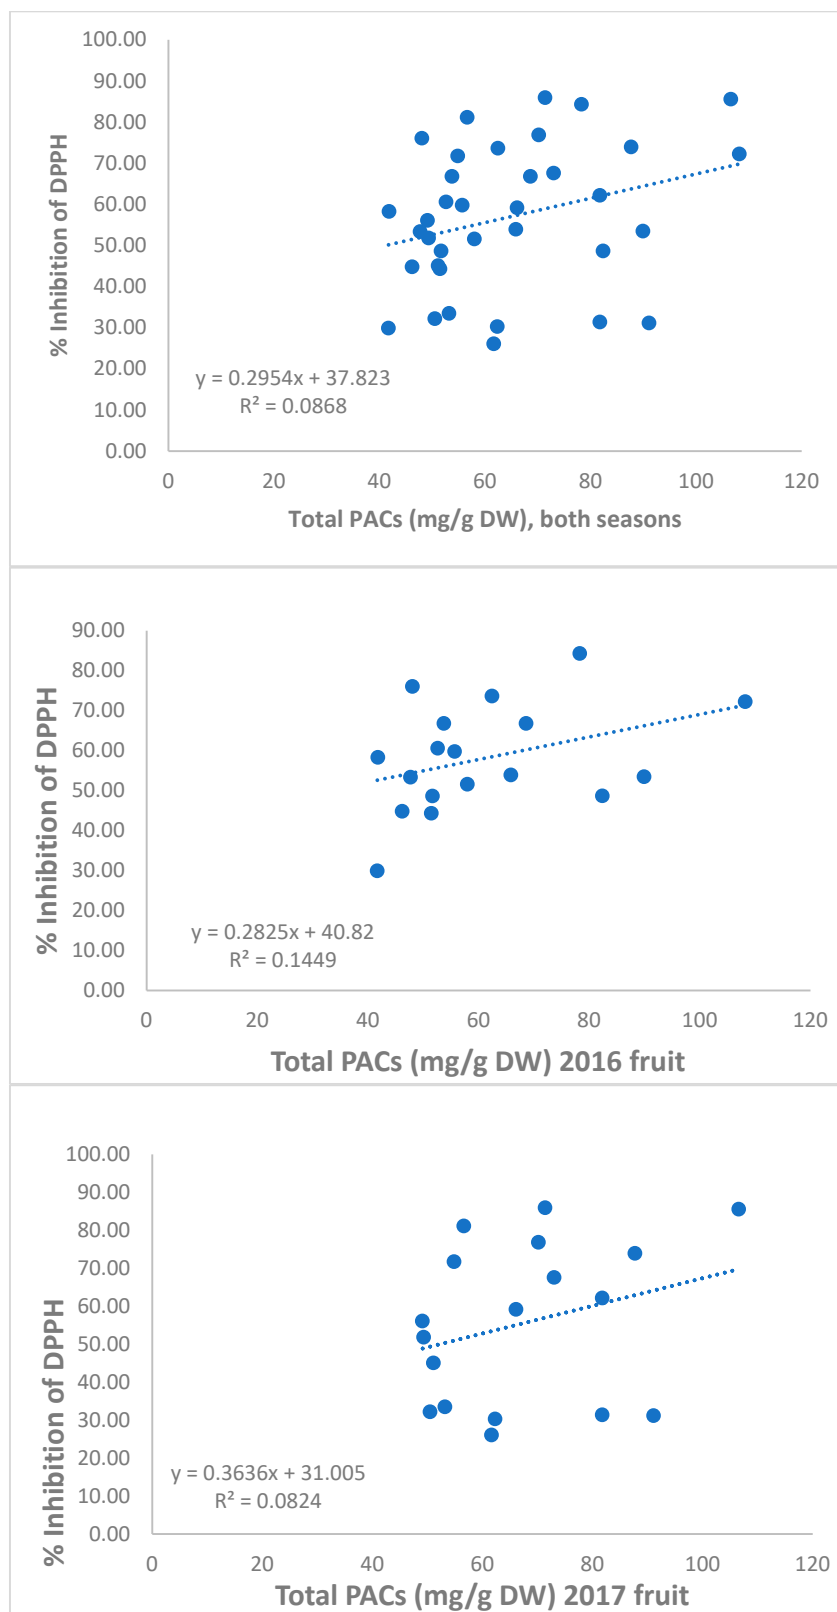

**Figure S4:** Linear correlation data for antioxidant activity with total PAC content. Top: All fruit treatments, no significant correlation ( $p = 0.322$ ). Middle: 2016 fruit, no significant correlation ( $p = 0.173$ ). Bottom: 2017 fruit, no significant correlation ( $p = 0.655$ ).

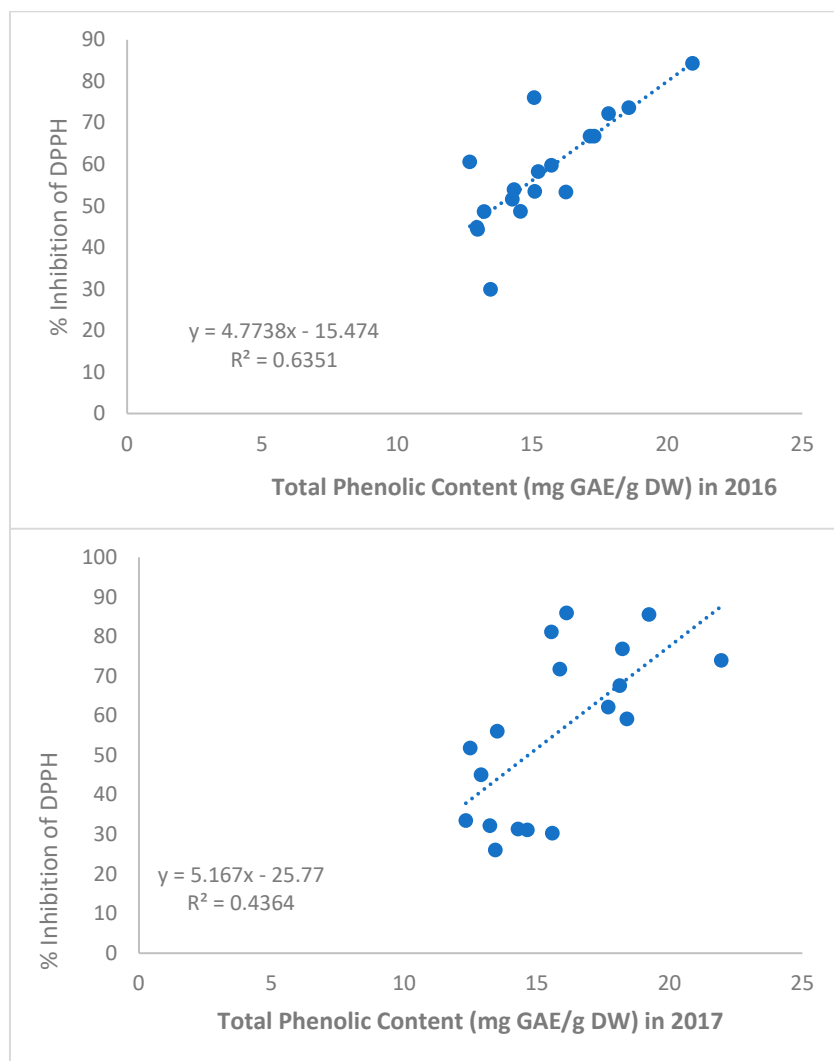

**Figure S5:** Linear correlation data for antioxidant activity with total phenolic content as measured by Folin-Ciocalteu assay. Top: 2016 fruit, significant positive correlation ( $p = 0.000206$ ). Bottom: 2017 fruit, significant positive correlation ( $p = 0.00587$ ).

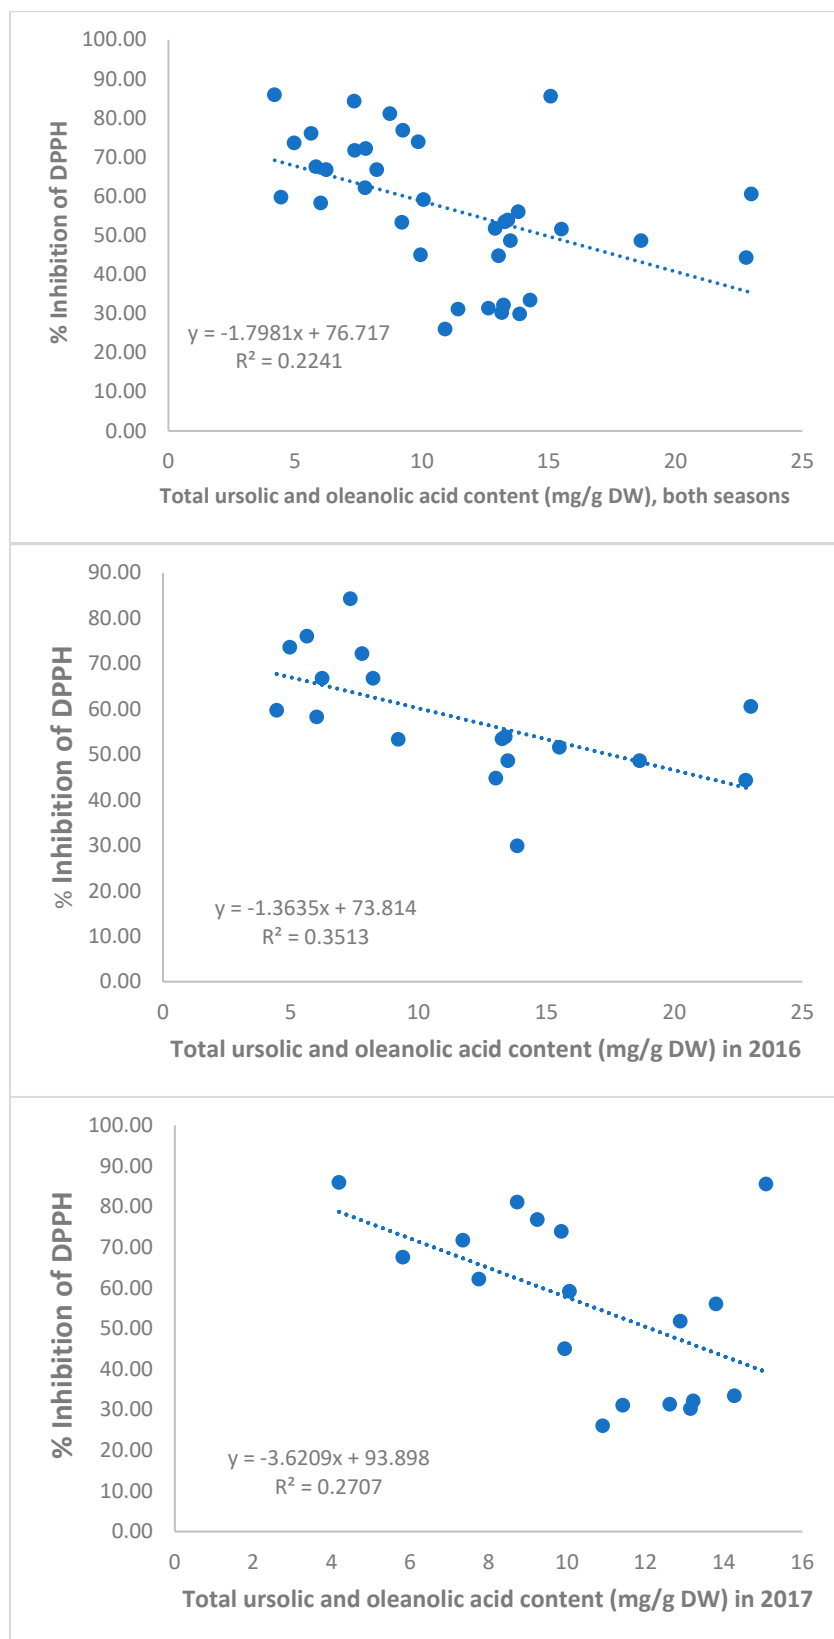

**Figure S6:** Linear correlation data for antioxidant activity with total content of triterpenoids ursolic and oleanolic acid. Top: All fruit treatments, significant negative correlation ( $p = 0.00446$ ). Middle:



2016 fruit, significant negative correlation ( $p = 0.0115$ ). Bottom: 2017 fruit, significant negative correlation ( $p = 0.0456$ ).
